# Supplementary material
Source: PubMed Central journal article supplement (PMC8580573)
Supplement: mmc1.pdf [file mmc1.pdf]

## Supplementary data

### Nanoparticulate CpG-adjuvanted SARS-CoV-2 S1 protein elicits broadly neutralizing and Th1-biased immunoreactivity in mice

#### Characterization of TMC and FUC-TMC NPs

To determine the degree of quaternization of the TMC polymers, <sup>1</sup>H nuclear magnetic resonance (NMR) spectra with an NMR spectrometer (AV-500, Bruker, Switzerland) was obtained by dissolving samples of the polymers in deuterium oxide at 80°C with suppression of the water peak.

The degree of quaternization was calculated with <sup>1</sup>H-NMR data according to the following equation.

$$\%DQ = ([N-(CH_3)_3]/[COCH_3]) \times 1/3 \times (1-\%DD)$$

where %DQ is the degree of quaternization as a percentage, %DD is the degree of deacetylation, [N-(CH<sub>3</sub>)<sub>3</sub>] is the integral of the singlet peak at 3.2 ppm from the methyl proton (9H) of the trimethylammonium chloride, and [COCH<sub>3</sub>] is the integral of the singlet peak at 2.0 ppm from the acetyl group of the N-acetyl-glucosamine residue. The %DQ obtained from <sup>1</sup>H-NMR spectra of TMC was 52%, (as shown in **Fig. S1A**).

FTIR spectrum of FUC (**Fig. S1B**) contained characteristic peaks at 3468 cm<sup>-1</sup> (O–H stretch), 2943 cm<sup>-1</sup> (C–H stretch), 1259 cm<sup>-1</sup> and 1232 cm<sup>-1</sup> (doublet, asymmetric stretch of the SO<sub>2</sub> group of secondary alkyl sulfate salt), 1051 cm<sup>-1</sup> (symmetric stretch of the SO<sub>2</sub> group), 1026 cm<sup>-1</sup> (C–O stretch), and 843 cm<sup>-1</sup> (asymmetric stretch of the S–O–C). The presence of glucuronic acid in the side chain of FUC yielded a characteristic band at 1638 cm<sup>-1</sup> (asymmetric stretch of CO<sub>2</sub><sup>-</sup>). In the (+)- and (-)-FUC-TMC NPs, the 1259 cm<sup>-1</sup> peak of asymmetric SO<sub>2</sub> stretch shifted to 1256 and 1255 cm<sup>-1</sup>, respectively, and the 1051 cm<sup>-1</sup> peak of symmetric SO<sub>2</sub> stretch shifted to 1054 cm<sup>-1</sup>. These differences indicated that an intermolecular PEC occurred between the quaternary ammonium group of TMC and the sulfate groups of FUC.

(A)

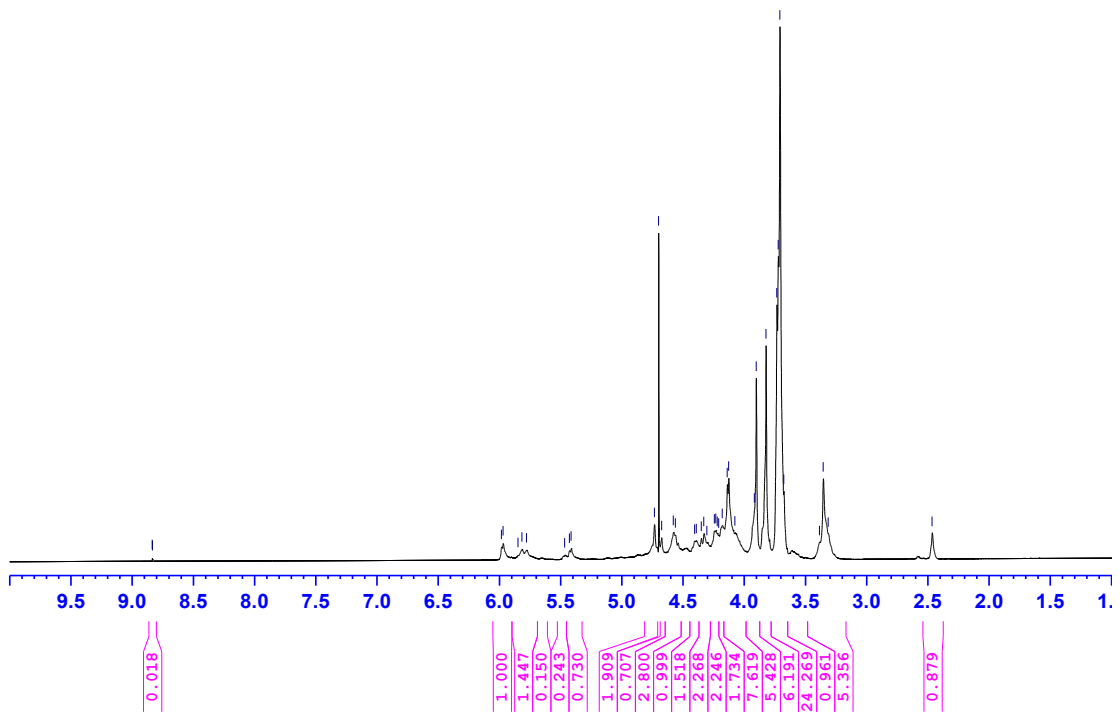

(B)

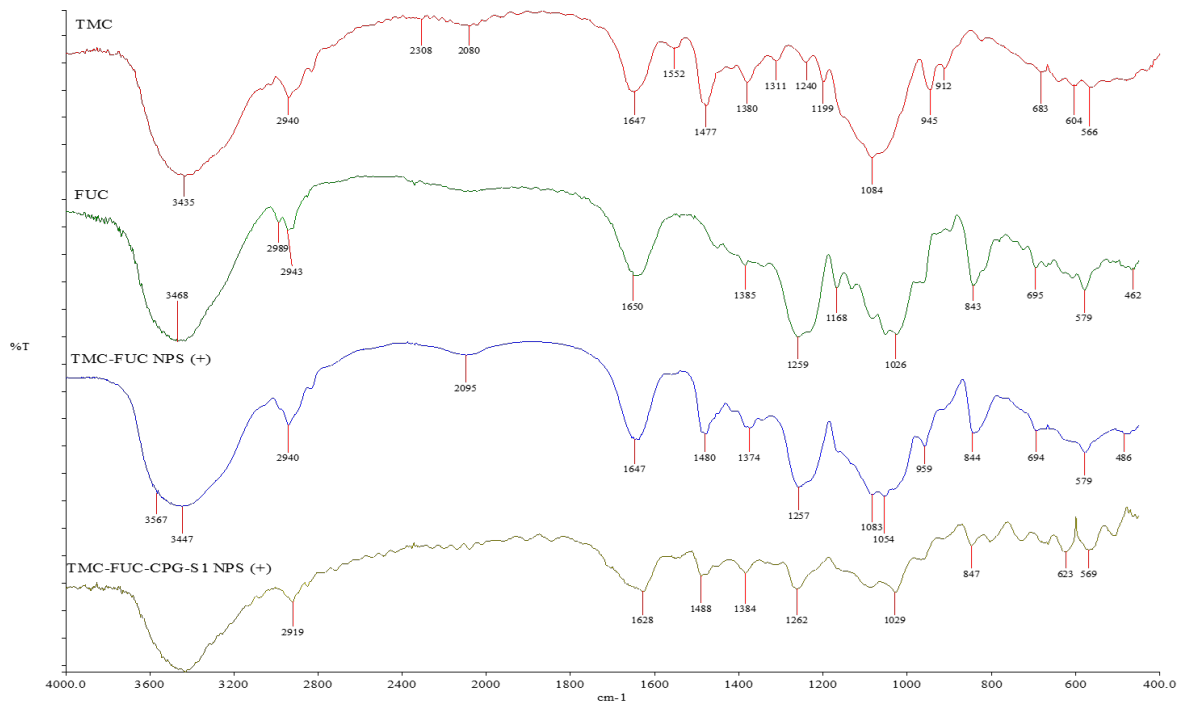

**Fig. S1.** (A) NMR spectra of TMC. (B) FTIR spectra of TMC, FUC, FUC-TMC NPs and rS1/FUC-TMC NPs/CpG.

**Table S1.** The particle size and zeta potential of FUC-TMC NPs, FUC-TMC NPs + rS1, FUC-TMC NPs + CpG and FUC-TMC NPs + rS1 + CpG used in immunization.

| Nanoparticles          | Mass ratio<br>FUC/TMC | Size*<br>nm | PDI*  | $\zeta^{**}$<br>mV |
|------------------------|-----------------------|-------------|-------|--------------------|
| FUC-TMC NPs            | 0.6                   | 357.4       | 0.435 | 30.7               |
| FUC-TMC NPs + rS1      | 0.6                   | 246.1       | 0.232 | 15.6               |
| FUC-TMC NPs + CpG      | 0.6                   | 288.5       | 0.244 | 16.6               |
| FUC-TMC NPs + rS1+ CpG | 0.6                   | 394.0       | 0.343 | 14.1               |

\* Measured by DLS method

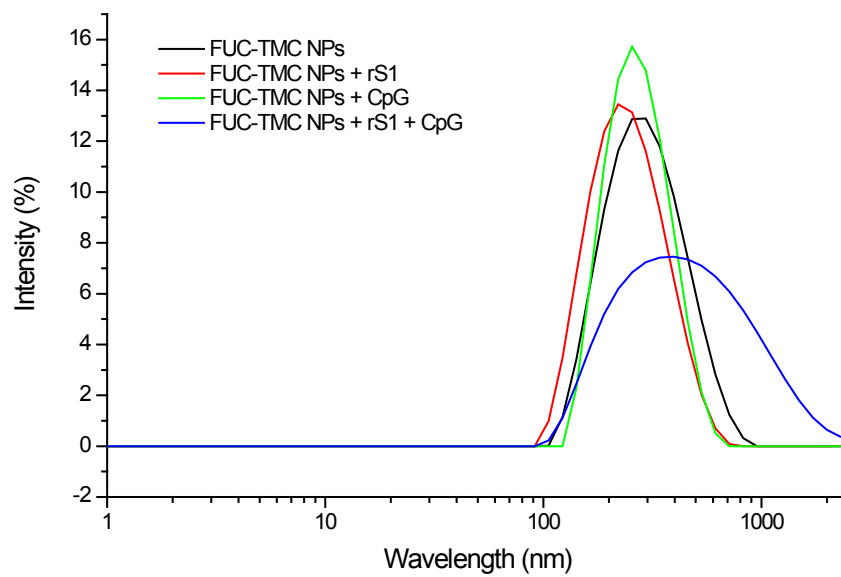

**Fig. S2.** Intensity size distribution of FUC-TMC NPs, FUC-TMC NPs+rS1, FUC-TMC NPs+CpG, and FUC-TMC NPs+rS1+CpG obtained by DLS.

**Table S2.** The cell viability, cytotoxicity and cytokines of FUC, TMC, (+)-FUC-TMC NPs and (-)-FUC-TMC NPs at the concentration (or TPC) of 200  $\mu\text{g}/\text{mL}$

| Cell or cytokines | FUC*               | TMC*             | (+)-FUC-TMC NPs** | (-)-FUC-TMC NPs** |
|-------------------|--------------------|------------------|-------------------|-------------------|
| Cell viability    | MTT assay          |                  |                   |                   |
| L929              | 103.5 $\pm$ 1.3%   | 75.8 $\pm$ 1.0%  | 99.4 $\pm$ 2.9%   | 98.8 $\pm$ 2.4%   |
| A549              | 101.9 $\pm$ 3.0%   | 65.5 $\pm$ 1.3%  | 101.1 $\pm$ 3.9%  | 94.2 $\pm$ 8.6%   |
| JAW II DCs        | 89.4 $\pm$ 4.6%    | 46.0 $\pm$ 5.6%  | 92.4 $\pm$ 4.5%   | 84.3 $\pm$ 3.4%   |
| Cytotoxicity      | LDH release assay  |                  |                   |                   |
| L929              | -8.7 $\pm$ 0.3%    | 27.0 $\pm$ 2.2%  | -3.9 $\pm$ 1.6%   | -7.8 $\pm$ 0.5%   |
| A549              | -32.0 $\pm$ 2.4%   | 25.5 $\pm$ 2.5%  | -2.2 $\pm$ 0.9%   | -3.6 $\pm$ 1.0%   |
| JAW II DCs        | 3.0 $\pm$ 0.7%     | 27.2 $\pm$ 0.5%  | 1.2 $\pm$ 0.6%    | 2.7 $\pm$ 1.1%    |
| Cytokines         | Relative MFI value |                  |                   |                   |
| IFN- $\gamma$     | 5.75 $\pm$ 0.25    | 8.64 $\pm$ 0.29  | 3.32 $\pm$ 0.14   | 1.00 $\pm$ 0.03   |
| IL-4              | 4.83 $\pm$ 0.11    | 3.28 $\pm$ 0.12  | 2.86 $\pm$ 0.15   | 1.24 $\pm$ 0.01   |
| IL-12p40          | 6.47 $\pm$ 0.31    | 11.77 $\pm$ 0.34 | 5.18 $\pm$ 0.26   | 1.26 $\pm$ 0.03   |
| IL-10             | 4.30 $\pm$ 0.22    | 4.78 $\pm$ 0.14  | 0.84 $\pm$ 0.03   | 1.10 $\pm$ 0.08   |

\* Concentration

\*\* Total polysaccharide concentration (TPC)

**Table S3.** Peptides included in the SARS-CoV-2 S1 scanning pool

| Peptide | Sequence         | Peptide | Sequence         | Peptide | Sequence        |
|---------|------------------|---------|------------------|---------|-----------------|
| 1       | SQCVNLTTRTQLPPA  | 57      | RFQTLALHRSYLTP   | 113     | LKPFERDISTEYQA  |
| 2       | NLTTTRTQLPPAYTNS | 58      | LLALHRSYLTPGDSS  | 114     | ERDISTEYQAGSTP  |
| 3       | RTQLPPAYTNSFTRG  | 59      | HRSYLTPGDSSSGWT  | 115     | STEYQAGSTPCNGV  |
| 4       | PPAYTNSFTRGVYYP  | 60      | LTPGDSSSGWTAGAA  | 116     | YQAGSTPCNGVEGFN |
| 5       | TNSFTRGVYYPDKVF  | 61      | DSSSGWTAGAAAYYV  | 117     | STPCNGVEGFNCYFP |
| 6       | TRGVYYPDKVFRSSV  | 62      | GWTAGAAAYYVGYLQ  | 118     | NGVEGFNCYFPLQSY |
| 7       | YYPDKVFRSSVLHST  | 63      | GAAAYYVGYLQPRTF  | 119     | GFNCYFPLQSYGFQP |
| 8       | KVFRSSVLHSTQDLF  | 64      | YYVGYLQPRTFLLKY  | 120     | YFPLQSYGFQPTNGV |
| 9       | SSVLHSTQDLFLPFF  | 65      | YLQPRTFLLKYENEG  | 121     | QSYGFQPTNGVGYQP |
| 10      | HSTQDLFLPFFSNVT  | 66      | RTFLLKYENEGTITD  | 122     | FQPTNGVGYQPYRVV |
| 11      | DLFLPFFSNVTWFHA  | 67      | LKYENEGTITDAVDC  | 123     | NGVGYQPYRVVLSF  |
| 12      | PFFSNVTWFHAIHVS  | 68      | ENGTITDAVDCALDP  | 124     | YQPYRVVLSFELLH  |
| 13      | NVTWFHAIHVSNGTNG | 69      | ITDAVDCALDPLSET  | 125     | RVVLSFELLHAPAT  |
| 14      | FHAIHVSNGTNGTKRF | 70      | VDCALDPLSETKCTL  | 126     | LSFELLHAPATVCGP |
| 15      | HVSGTNGTKRFDNPV  | 71      | LDPLSETKCTLKST   | 127     | LLHAPATVCGPKKST |
| 16      | TNGTKRFDNPVLPFN  | 72      | SETKCTLKSTVEKG   | 128     | PATVCGPKKSTNLVK |
| 17      | KRFDNPVLPFNDGVY  | 73      | CTLKSTVEKGIYQT   | 129     | CGPKKSTNLVKNCV  |
| 18      | NPVLPFNDGVYFAST  | 74      | SFTVEKGIYQTSNFR  | 130     | KSTNLVKNCVNFNF  |
| 19      | PFNDGVYFASTEKSN  | 75      | EKGIYQTSNFRVQPT  | 131     | LVKNKCVNFNFNGLT |
| 20      | GVYFASTEKSNIRG   | 76      | YQTSNFRVQPTESIV  | 132     | KCVNFNFNGLTGTGV |
| 21      | ASTEKSNIRGWIFG   | 77      | NFRVQPTESIVRFPN  | 133     | FNFNGLTGTGVLTES |
| 22      | KSNIIRGWIFGTTL   | 78      | QPTESIVRFPNITNL  | 134     | GLTGTGVLTESNKKF |
| 23      | IRGWIFGTTLDSKTQ  | 79      | SIVRFPNITNLCPCFG | 135     | TGVLTESNKKFLPFQ |
| 24      | IFGTTLDSKTQSLLI  | 80      | FPNITNLCPCFGEVFN | 136     | TESNKKFLPFQFGR  |
| 25      | TLDSKTQSLLIVNNA  | 81      | TNLCPCFGEVFNATRF | 137     | KKFLPFQFGRDIAD  |
| 26      | KTQSLLIVNNAATNVV | 82      | PCFGEVFNATRFASVY | 138     | PFQFGRDIADTTDA  |
| 27      | LLIVNNAATNVVIKVC | 83      | VFNATRFASVYAWNR  | 139     | FGRDIADTTDAVRDP |
| 28      | NNATNVVIKVCCEFQF | 84      | TRFASVYAWNRKRIS  | 140     | IADTTDAVRDPQTLE |
| 29      | NVVIKVCCEFQFCNDP | 85      | SVYAWNRKRISNCVA  | 141     | TDAVRDPQTLEILDI |
| 30      | KVCEFQFCNDPFLGV  | 86      | WNRKRISNCVADYSV  | 142     | RDPQTLEILDITPCS |
| 31      | FQFCNDPFLGVYYHK  | 87      | RISNCVADYSVLYNS  | 143     | TLEILDITPCSFGGV |
| 32      | NDPFLGVYYHKNNKS  | 88      | CVADYSVLYNSASFS  | 144     | LDITPCSFGGVSVIT |
| 33      | LGVYYHKNNKSWMES  | 89      | YSVLYNSASFSTFKC  | 145     | PCSFGGVSVITPGTN |
| 34      | YHKNNKSWMESEFRV  | 90      | YNSASFSTFKCYGVS  | 146     | GGVSVITPGTNTSNQ |
| 35      | NKSWMESEFRVYSSA  | 91      | SFSTFKCYGVSPTKL  | 147     | VITPGTNTSNQVAVL |
| 36      | MESEFRVYSSANNCT  | 92      | FKCYGVSPTKLNLDLC | 148     | GTNTSNQVAVLYQDV |
| 37      | FRVYSSANNCTFEYV  | 93      | GVSPTKLNLDLCFTNV | 149     | SNQVAVLYQDVNCTE |
| 38      | SSANNCTFEYVSQPF  | 94      | TKLNLDLCFTNVYADS | 150     | AVLYQDVNCTEVPVA |
| 39      | NCTFEYVSQPFMDL   | 95      | DLCTNVYADSFVIR   | 151     | QDVNCTEVPVAIHAD |
| 40      | EYVSQPFMDLEGKQ   | 96      | TNVYADSFVIRGDEV  | 152     | CTEVPVAIHADQLTP |
| 41      | QPFMDLEGKQGNFK   | 97      | ADSFVIRGDEVQRQA  | 153     | PVAIHADQLTPTWRV |
| 42      | MDLEGKQGNFKNLRE  | 98      | VIRGDEVQRQAIPGQT | 154     | HADQLTPTWRVYSTG |
| 43      | GKQGNFKNLREFVFK  | 99      | DEVQRQAIPGQTGKIA | 155     | LTPTWRVYSTGSNVF |
| 44      | NFKNLREFVFKNIDG  | 100     | QIAPGQTGKIADYNY  | 156     | WRVYSTGSNVFQTRA |
| 45      | LREFVFKNIDGYFKI  | 101     | GQTGKIADYNYKLPD  | 157     | STGSNVFQTRAGCLI |
| 46      | VFKNIDGYFKIYSKH  | 102     | KIADYNYKLPDDFTG  | 158     | NVFQTRAGCLIGAEH |
| 47      | IDGYFKIYSKHTPIN  | 103     | YNYKLPDDFTGCVIA  | 159     | TRAGCLIGAEHVNNS |
| 48      | FKIYSKHTPINLVRD  | 104     | LPDDFTGCVIAWNSN  | 160     | CLIGAEHVNNSYECD |
| 49      | SKHTPINLVRDLPQG  | 105     | FTGCVIAWNSNNLDS  | 161     | AEHVNNSYECDIPIG |
| 50      | PINLVRDLPQGFSAL  | 106     | VIAWNSNNLDSKVG   | 162     | NNSYECDIPIGAGIC |
| 51      | VRDLPQGFSALEPLV  | 107     | NSNNLDSKVGGNVNY  | 163     | ECDIPIGAGICASYQ |
| 52      | PQGFSALEPLVDLPI  | 108     | LDSKVGGNVNYLYRL  | 164     | PIGAGICASYQTQTN |
| 53      | SALEPLVDLPIGINI  | 109     | VGGNLYLYRLFRKS   | 165     | GICASYQTQTNsprr |
| 54      | PLVDLPIGINITRFQ  | 110     | YNYLYRLFRKSNLKP  | 166     | SYQTQTNsprrar   |
| 55      | LPIGINITRFQTLA   | 111     | YRLFRKSNLKPFRD   |         |                 |
| 56      | INITRFQTLALHRS   | 112     | RKSNLKPFRDISTE   |         |                 |
